# Supplementary material
Source: publisher figshare collection journal article supplement (https://sage.figshare.com/ndownloader/files/17591453)
Supplement: Supplementary file 1 [file 17591453]

## QUESTIONNAIRE

1- Of the following economic activities that I am going to comment you, can you point the three that you consider that are the most important in the economy of Gran Canaria? (To read all of them)

|                           | 1º | 2º | 3º |
|---------------------------|----|----|----|
| Agriculture and Fisheries |    |    |    |
| Health                    |    |    |    |
| Construction              |    |    |    |
| Industry                  |    |    |    |
| Tourism                   |    |    |    |
| Trade                     |    |    |    |
| Transport                 |    |    |    |
| Education                 |    |    |    |
| DN/NA                     |    |    |    |

2- Could you tell me if the topics related to tourism in Gran Canaria interest you very much, a few or nothing?

|         |
|---------|
| Much    |
| Enough  |
| Few     |
| Nothing |
| DN/NA   |

3- How do you think the following aspects have been affected by tourism in Gran Canaria? On a scale of 1 to 5:  
1 very negatively and 5 very positively.

|                                                                                    | Very negatively<br>Negatively<br>Neither positive nor negative (not affect)<br>Positively<br>Very positively |
|------------------------------------------------------------------------------------|--------------------------------------------------------------------------------------------------------------|
| Creation of new jobs                                                               |                                                                                                              |
| Improvement of infrastructures (communications, urban equipment)                   |                                                                                                              |
| Generation of wealth and Economic growth                                           |                                                                                                              |
| Conservation of the environment                                                    |                                                                                                              |
| Improvement of the cultural and leisure offer                                      |                                                                                                              |
| Improvement of the quality of life in its municipality (tranquillity, coexistence) |                                                                                                              |
| Increase of the citizen security                                                   |                                                                                                              |
| Availability of affordable housing                                                 |                                                                                                              |
| Containment of prices                                                              |                                                                                                              |
| Improvement of public services                                                     |                                                                                                              |

4- What importance do you believe that tourism has for the economy of its Municipality?

|                   |
|-------------------|
| Very Important    |
| Quite important   |
| Little important  |
| Nothing important |
| DN/NA             |

5- Throughout the year...: do you meet tourists?

|                                       |
|---------------------------------------|
| All or almost every month of the year |
| In summer and holidays                |
| Only in summer                        |
| Almost never                          |
| Never                                 |
| DN/NA                                 |

Filter 5A - And in those moments of the year, they are found...

|                                     |
|-------------------------------------|
| Every day or almost every day       |
| Only on weekends                    |
| Rarely (festivals, punctual events) |
| DN/NA                               |

5B - Where take place those encounters?

|                                                   |
|---------------------------------------------------|
| In the Municipality in which I live               |
| In the Municipality in which I spend the holidays |
| In both places                                    |
| DN/NA                                             |

6- How would you say that it is the treatment and the attention that the grancanarians give to tourists?

|           |
|-----------|
| Very good |
| Good      |
| Bad       |
| Very bad  |
| DN/NA     |

7- In your opinion, tourists who visit the island ...

| Have a purchasing power? | And their behaviour here is? | Are they respectful with the environment? |
|--------------------------|------------------------------|-------------------------------------------|
| High                     | Very nice                    | Many                                      |
| Medium                   | Nice                         | Enough                                    |
| Low                      | Normal (don't read)          | Little                                    |
| DN/NA                    | Unpleasant                   | Nothing                                   |
|                          | Very unpleasant              | DN/NA                                     |
|                          | DN/NA                        |                                           |

8- Are you in any of the following situations?

|                                                                                               | Yes | No | DN/NA |
|-----------------------------------------------------------------------------------------------|-----|----|-------|
| When traveling in Gran Canaria avoid visiting the areas where there are more foreign tourists |     |    |       |
| You have to adjust your daily life to avoid tourists                                          |     |    |       |
| Tourists cause significant inconvenience in your nearby environment                           |     |    |       |
| There are shops where foreign tourists are better received or treated than residents          |     |    |       |

9- It is often said that tourism depends on the involvement of all. What things do you think should make individually the grancanarians, to improve the situation of the tourism on the island? OPEN QUESTION. POINT UP TO THREE ANSWERS (Spontaneous answer. Clarification for "Do not know": "It refers to behaviours, actions, or other ideas that people can carry out so that tourists have a better impression of their trip to Gran Canaria")

10- To what extent do you agree with the following sentences about the tourism in Gran Canaria?

|                                                                                                                       | Very much agree | Agree | Neither agree nor disagree | Disagree | Very much disagree | DN/NA |
|-----------------------------------------------------------------------------------------------------------------------|-----------------|-------|----------------------------|----------|--------------------|-------|
| The jobs generated by tourism are of poor quality                                                                     |                 |       |                            |          |                    |       |
| Tourism has had a positive effect on natural resources and landscape                                                  |                 |       |                            |          |                    |       |
| Most of the jobs that tourism creates are occupied by immigrants                                                      |                 |       |                            |          |                    |       |
| Facing the future, it would be necessary to resign from the tourism and to think about other development alternatives |                 |       |                            |          |                    |       |
| Most of the wealth generated by tourism benefits companies that are from outside the island                           |                 |       |                            |          |                    |       |
| Thanks to tourism, the unemployed have more opportunities to get a good job                                           |                 |       |                            |          |                    |       |
| The quality of the tourists visiting our island has improved in recent years                                          |                 |       |                            |          |                    |       |
| The tourist offer (hotels, restaurants) of Gran Canaria is of very good quality                                       |                 |       |                            |          |                    |       |
| It is necessary to try to increase the number of persons who visit the island                                         |                 |       |                            |          |                    |       |

11- What do you consider to be the most positive impact of tourism for Gran Canaria? POINT UP TO THREE

|       |
|-------|
| 1.    |
| 2.    |
| 3.    |
| DN/NA |

12- What do you consider to be the most negative impact of tourism for Gran Canaria? POINT UP TO THREE

|       |
|-------|
| 1.    |
| 2.    |
| 3.    |
| DN/NA |

13- Do you agree with the following sentences about tourism in Gran Canaria?

|                                                                                                               | YES | NO | DN | NA |
|---------------------------------------------------------------------------------------------------------------|-----|----|----|----|
| In the last two years has decreased the number of tourists who visits us                                      |     |    |    |    |
| In the last year between 20 and 30 thousand new job places have been generated in the canarian tourist sector |     |    |    |    |
| The tourists who visit us spend each time less money                                                          |     |    |    |    |
| The tourist facilities occupy a large part of the coast of the island                                         |     |    |    |    |

14- What do you think about the following sentences?

|                                                                                                           | Very much agree | Agree | Neither agree nor disagree | Very much disagree | Disagree | DN/NA |
|-----------------------------------------------------------------------------------------------------------|-----------------|-------|----------------------------|--------------------|----------|-------|
| The wealth generated by tourists is poorly distributed                                                    |                 |       |                            |                    |          |       |
| Tourists spend little money, generating few benefits                                                      |                 |       |                            |                    |          |       |
| The Gran Canaria train will be good for tourist development and mobility of tourists and residents        |                 |       |                            |                    |          |       |
| The island's southern tourist would not support more new buildings                                        |                 |       |                            |                    |          |       |
| The possible oil explorations, endanger as a tourist resource, the beaches of Fuerteventura and Lanzarote |                 |       |                            |                    |          |       |
| The tourism moratorium has slowed the investments and the tourist growth in Canaries                      |                 |       |                            |                    |          |       |
| With the shutdown of the construction, the tourism has become in the main exit of the                     |                 |       |                            |                    |          |       |

|                                                                                                                                    |  |  |  |  |  |  |
|------------------------------------------------------------------------------------------------------------------------------------|--|--|--|--|--|--|
| crisis                                                                                                                             |  |  |  |  |  |  |
| The tourist south of the island has too many obsolete facilities and it is necessary to renew them                                 |  |  |  |  |  |  |
| We have an extreme dependence on flights and that is not sustainable in the long-term                                              |  |  |  |  |  |  |
| The rise of IGIC tax and the cancellation of the subventions of the airport charges will be damaging tourism in the Canary Islands |  |  |  |  |  |  |

15- Have you worked or work in tourism-related activities?

|       |
|-------|
| YES   |
| NO    |
| DN/NA |

16- In your nearest family (father, mother, brothers, children, grandchildren) is there any member who works or has worked in tourism?

|       |
|-------|
| YES   |
| NO    |
| DN/NA |

17- Have you done any leisure trip during the last twelve months? (It is understood by leisure trip if overnight one or more nights outside its Municipality for reasons not related to the job)

|       |
|-------|
| YES   |
| NO    |
| DN/NA |

} Filter 17A - Detail destination as much as possible (province, visited country area, etc.)  
 } Filter 17B - Why haven't you travelled in the last 12 months? CHOOSE ONLY 1 motive

|                                                       |
|-------------------------------------------------------|
| Problems of health, proper or of relatives or friends |
| Motives of job, proper or of relatives or friends     |
| Economic motives                                      |
| Does not like, Does not interested in                 |
| Other motives                                         |
| DN/NA                                                 |

18- Who has more decision power and influences in the tourist sector of Gran Canaria? TO READ ALL. TO CHOOSE UP TO 3.

|                                      |
|--------------------------------------|
| Touroperators and Travel Agencies    |
| The Government of the Canary Islands |
| The hoteliers and hotel chains       |
| The Government of Spain              |
| The Banks                            |

|                                                                                                       |
|-------------------------------------------------------------------------------------------------------|
| The Municipalities                                                                                    |
| The rest of traders in the sector (restaurants, leisure activities shops, souvenir shops, rent a car) |
| The Government of the Island                                                                          |
| The Airlines companies                                                                                |
| None / I don't care                                                                                   |
| DN/NA                                                                                                 |

19- What type of tourists do you prefer in Gran Canaria? READ ALL. CHOOSE UP TO 3.

|                           |
|---------------------------|
| Traditional families      |
| Young people and students |
| Pensioners and pensioners |
| Gays                      |
| Alone persons             |
| Sports tourists           |
| None in special / any     |
| DN/NA                     |

20- And do you prefer Spanish or foreign tourists?

|              |   |
|--------------|---|
| Spanish      | } |
| Foreigners   |   |
| None         |   |
| I don't care |   |
| DN/NA        |   |

Filter 20A - Why "Spanish", or "foreigners", or "none"?

21- Among foreign tourists, do you feel preference for any nationality?

|       |                       |
|-------|-----------------------|
| YES   | } Filter 21A - Which? |
| NO    |                       |
| DN/NA |                       |

#### SOCIODEMOGRAPHIC DATA

##### Gender

Man

Women

##### Marital Status

Single

Married

Coexists in couple

Divorced or separated

Widower

Other

DN/NA

**Age**

DN/NA

**Work**

Last week, from Monday to Sunday, have you done some paid work (in cash or in kind) as a salaried employee or by your account?

YES } Filter. Detail main occupation

NO } Filter

Retired or pensioner (previously worked)

Pensioner (previously has not worked)

Housewife/charge from home

Stopped and has worked before

Stopped and seeking the first jobs

Student

Another situation

DN/NA

**Where have you been born?**

In this Municipality

In another Municipality of this Island

In another Island of the Province of Las Palmas

In another Island of the Province of Santa Cruz de Tenerife

In another Autonomous region

Abroad

DN/NA

**Studies**

Could you tell me what level of completed studies you have?

Do not know how to read or write

Know how to read and write, but was less than 5 years to School

Went to the school 5 or more years, but without complete EGB, ESO or Baccalaureate Elementary

Bachelor Elementary, EGB, ESO (graduate school)

Bachelor higher, BUP, Bachelor LOGSE COU, PREU

FPI, FP degree, or Equivalent

FP II, FP top cycle, industrial or equivalent Master, Conservatory 10 years

Diploma course, Technical Engineering, 3 approved courses of Licenciature, Engineering or Architecture,

Engineering, Licenciature or equivalent

Doctorate

DN/NA

**Income**

Could you tell me, finally, what are the net income that comes into your home per month for all the concepts?

Less than 500

501 to 1000

1001 to 1500

1501 to 2000

2001 to 2500

2501 to 3000

More than 3000 €

DN/NA
